# Supplementary material
Source: PubMed Central journal article supplement (PMC4731288)
Supplement: supp_WNL.0000000000002235_del_campo_86_36.pdf [file supp_WNL.0000000000002235_del_campo_86_36.pdf]

## 局部脑内 $\beta$ 淀粉样肽沉积与步行速度的相关性

Natalia del Campo, PhD; Pierre Payoux, MD, PhD; Adel Djilali, PhD; Julien Delrieu, MD;  
Emiel O. Hoogendijk, PhD; Yves Rolland, MD, PhD; Matteo Cesari, MD, PhD; Michael W. Weiner, MD, PhD;  
Sandrine Andrieu, MD, PhD; Bruno Vellas, MD, PhD For the MAPT/DSA study Group

**目的：**旨在研究痴呆高危老年人群中局部脑区 $\beta$ 淀粉样肽( $\beta$ -amyloid, A $\beta$ )沉积与步行速度的相关性

**方法：**评估 128 例老年受试者脑内 A $\beta$  沉积(采用 PET 示踪剂 [ $^{18}$ F] Florbetapir 标记测定)与步行速度的横断面相关性。受试者均来自于多领域阿尔茨海默病预防试验(Multidomain Alzheimer Preventive Trial, MAPT)中不同干预中对照组的健康或轻度认知障碍老年人。几乎所有的受试者都有自发的记忆相关的主诉。以小脑作为参照区,经半自动定量分析获取局部 [ $^{18}$ F] Florbetapir(AV45)的标准吸收容积比。评估受试者步行 4 米所需时间以测定步行速度。校正年龄、性别、受教育程度、体重指数(body mass index, BMI)和 APOE 基因型后,采用线性回归法研究两者间的相关性。

**结果：**我们发现,壳核前后部、枕叶皮质区、楔前叶和扣带回前部 A $\beta$  的沉积与步行速度减慢有显著相关性(所有校正后  $p < 0.05$ )。而在多变量模型中则强调了壳核后部和楔前叶脑区。高达 9% 的步行速度的变异可用 A $\beta$  沉积来解释,且在显著改善的回归模型中已经包含了人口统计学变量、BMI 和 APOE 状态。

**结论：**本研究证实了既往尸检结果显示在体内阿尔茨海默病的病理改变与步行速度间具有相关性,并为脑内 A $\beta$  沉积对运动功能的潜在局部影响提供附加证据。仍需更多研究进一步阐明导致这种局部关联的神经机制,可能会涉及到 AD 的病理生理学中迄今为止大部分仍被忽视的运动和感觉运动环路。Neurology® 2016;86:36–43
